# Supplementary material
Source: Springer Nature journal article supplement (https://www.springermedizin.de/resource/supplementary/12974_2010_227_MOESM6_ESM.pdf/9601036)
Supplement: MOESM6 [file 9601036]

# 30min MCAO: neurological deficit

## 24h reperfusion

## 48h reperfusion

## 72h reperfusion

mixed gender

male

female

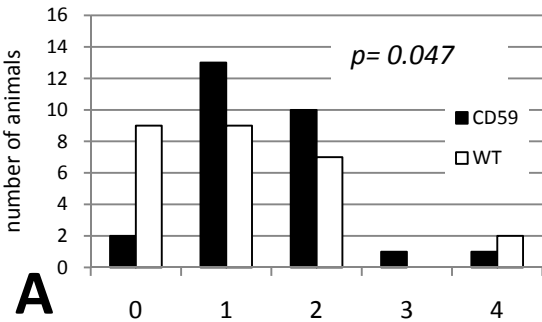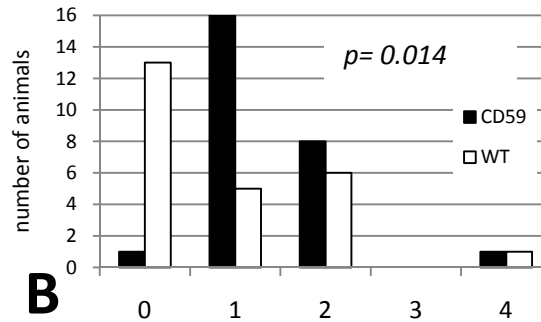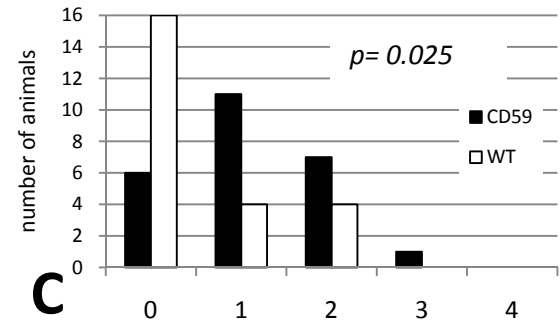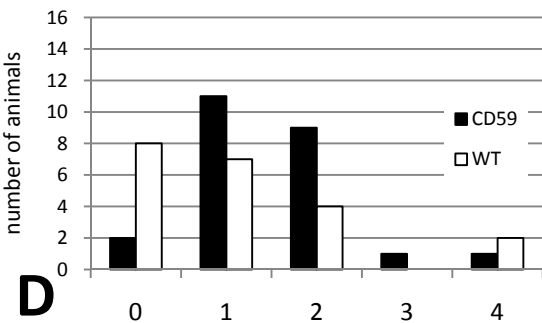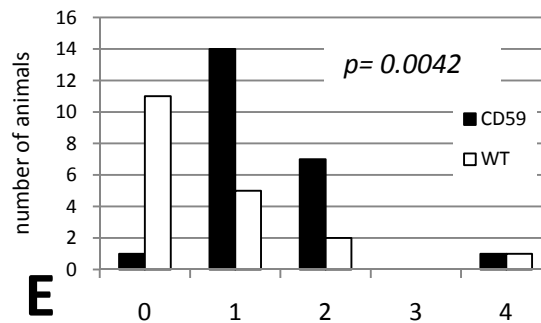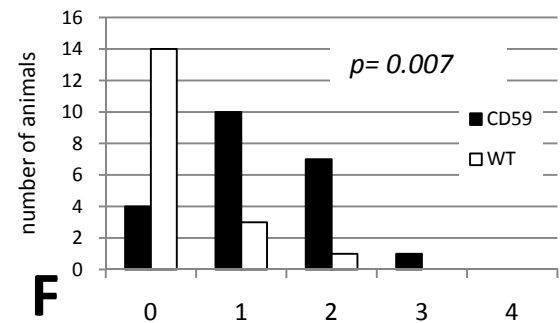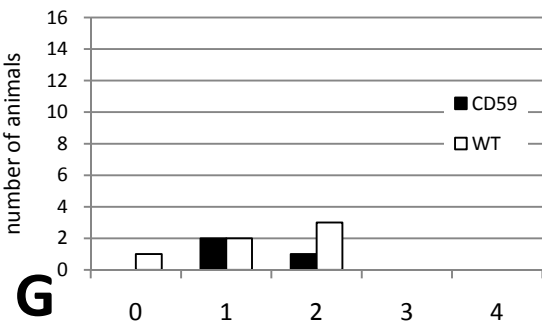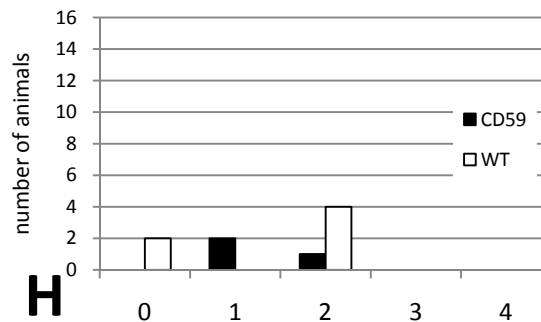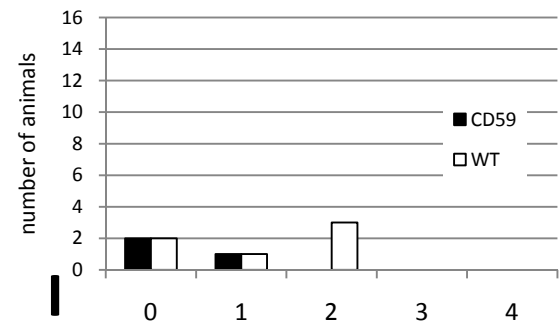

severity of neurological deficit

severity of neurological deficit

severity of neurological deficit
